# Supplementary material
Source: HighWire-hosted journal article supplement (https://www.cmajopen.ca/highwire/filestream/89368/field_highwire_adjunct_files/5/open-2021-0320-5-at.pdf)
Supplement: open-2021-0320-5-at.pdf [file open-2021-0320-5-at.pdf]

Supplementary Table 5: Frequency of reasons for not visiting the hospital or seeing a doctor while needing to reported by CLSA COVID-19 exit survey (Sept. to Dec. 2020) participants (N=1731)

| <b>Service</b>                                      | <b>N (%)</b> |
|-----------------------------------------------------|--------------|
| Services redirected to priority groups              | 735 (42.5)   |
| Fear of COVID-19 contact                            | 680 (39.3)   |
| None of the above                                   | 437 (25.2)   |
| Fear of physical or emotional discomfort            | 102 (5.9)    |
| Did not want to learn about chronic/serious illness | 84 (4.8)     |
| No one to accompany                                 | 60 (3.5)     |
| Difficulty finding transportation                   | 55 (3.2)     |
